# Supplementary material for: Neurotropin Inhibits Lipid Accumulation by Maintaining Mitochondrial Function in Hepatocytes via AMPK Activation
Source: PubMed Central journal article supplement (PMC7424056; doi:10.3389/fphys.2020.00950), 2020-08-06
Supplement: Data_Sheet_1.pdf [file Data_Sheet_1.pdf]

## Supplementary Material

### 1.1 Supplementary Figures

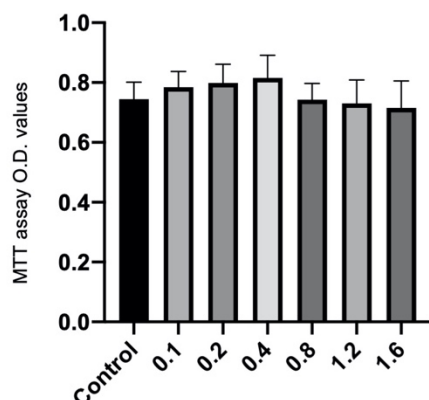

**Supplementary Figure 1. Evaluation of toxicity of NTP on primary mouse hepatocytes.** Primary hepatocytes were treated with Vehicle or NTP (0.1, 0.2, 0.4, 0.8, 1.2, or 1.6 NU/mL) for 24 h. Hepatocyte viability was examined by MTT assays.

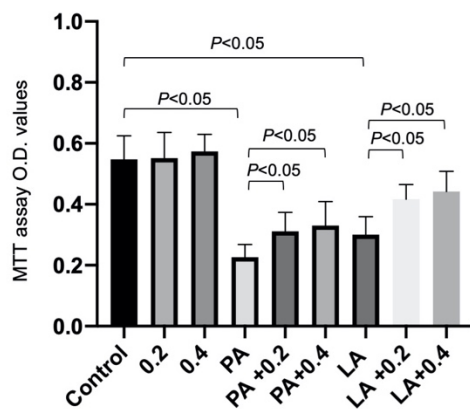

**Supplementary Figure 2. Effects of NTP on cell viability in PA- and LA-treated hepatocytes.**

Primary hepatocytes were pretreated with NTP (0.2 or 0.4 NU/mL) for 1 h, followed by treatment with 200  $\mu$ M palmitate (PA) or 12  $\mu$ M linoleate (LA) for an additional 24 h. Hepatocyte viability was examined by MTT assays.
